# Supplementary material for: Photoreactive Coating Material as an Effective and Durable Antimicrobial Composite in Reducing Bacterial Load on Surfaces in Livestock
Source: MDPI journal article supplement (doi:10.3390/biomedicines10092312), 2022-09-17
Supplement: s1 [file s1]

## *Supplemental material*

# **Photoreactive coating material as an effective and durable antimicrobial composite in reducing bacterial load on surfaces in livestock**

Ádám Kerek <sup>1,\*</sup>, Mátyás Sasvári <sup>1</sup>, Ákos Jerzsele <sup>1</sup>, Zoltán Somogyi <sup>1</sup>, László Janovák <sup>2</sup>,  
Zsolt Abonyi-Tóth <sup>3</sup> and Imre Dékány <sup>2</sup>

1 Department of Pharmacology and Toxicology, University of Veterinary  
Medicine, István Street 2, H-1078 Budapest, Hungary

2 Department of Physical Chemistry and Materials Science, University of Szeged,  
Rerrich Béla tér 1, H-6720 Szeged, Hungary

3 Department of Biomathematics and Informatics, University of Veterinary  
Medicine, István Street 2, H-1078 Budapest, Hungary

\* Correspondence: kerek.adam@univet.hu

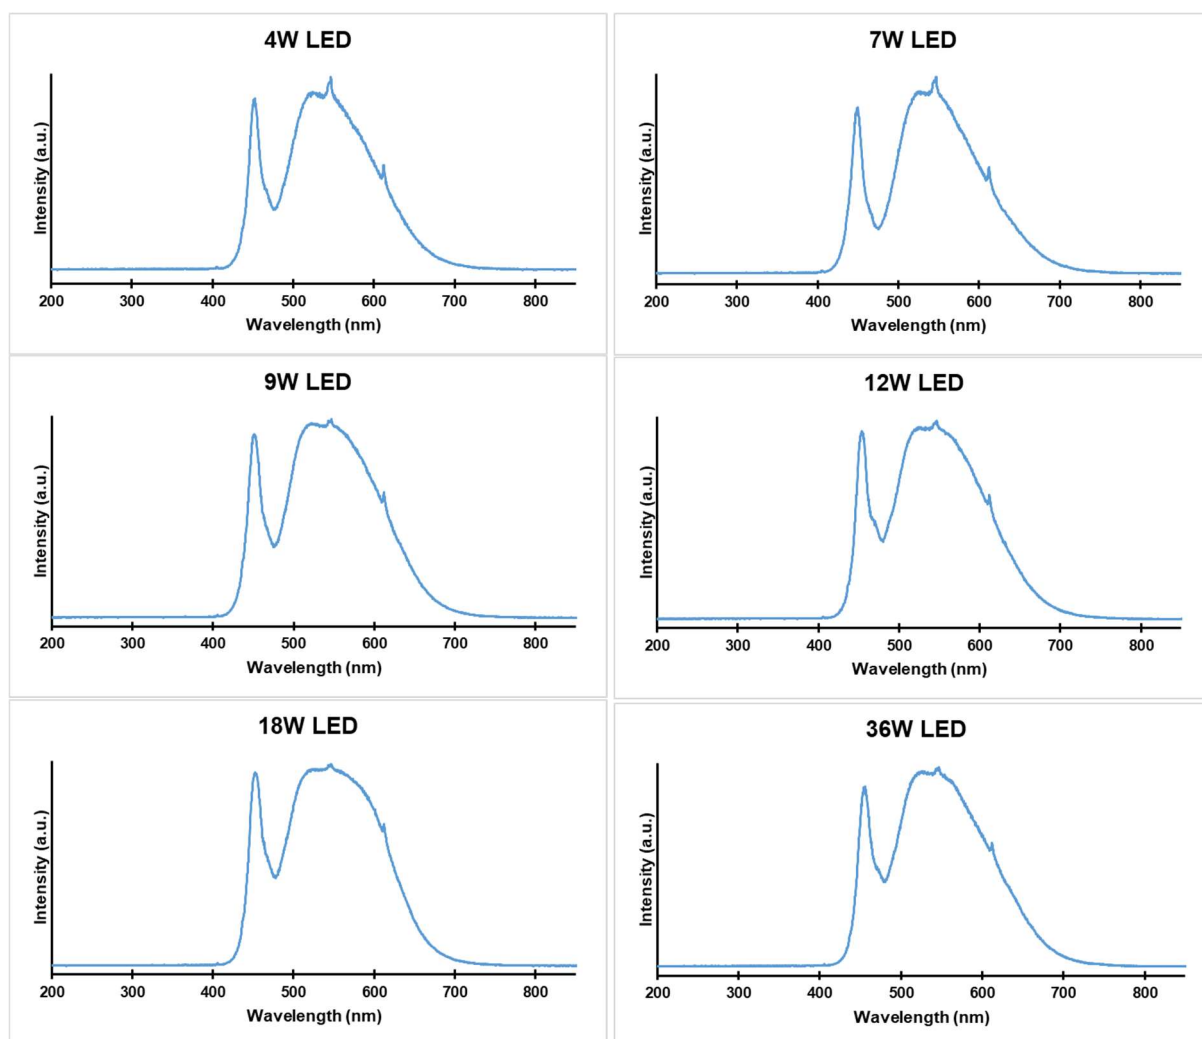

**Figure S1.** The emission spectra of LED light sources with increasing wattage.

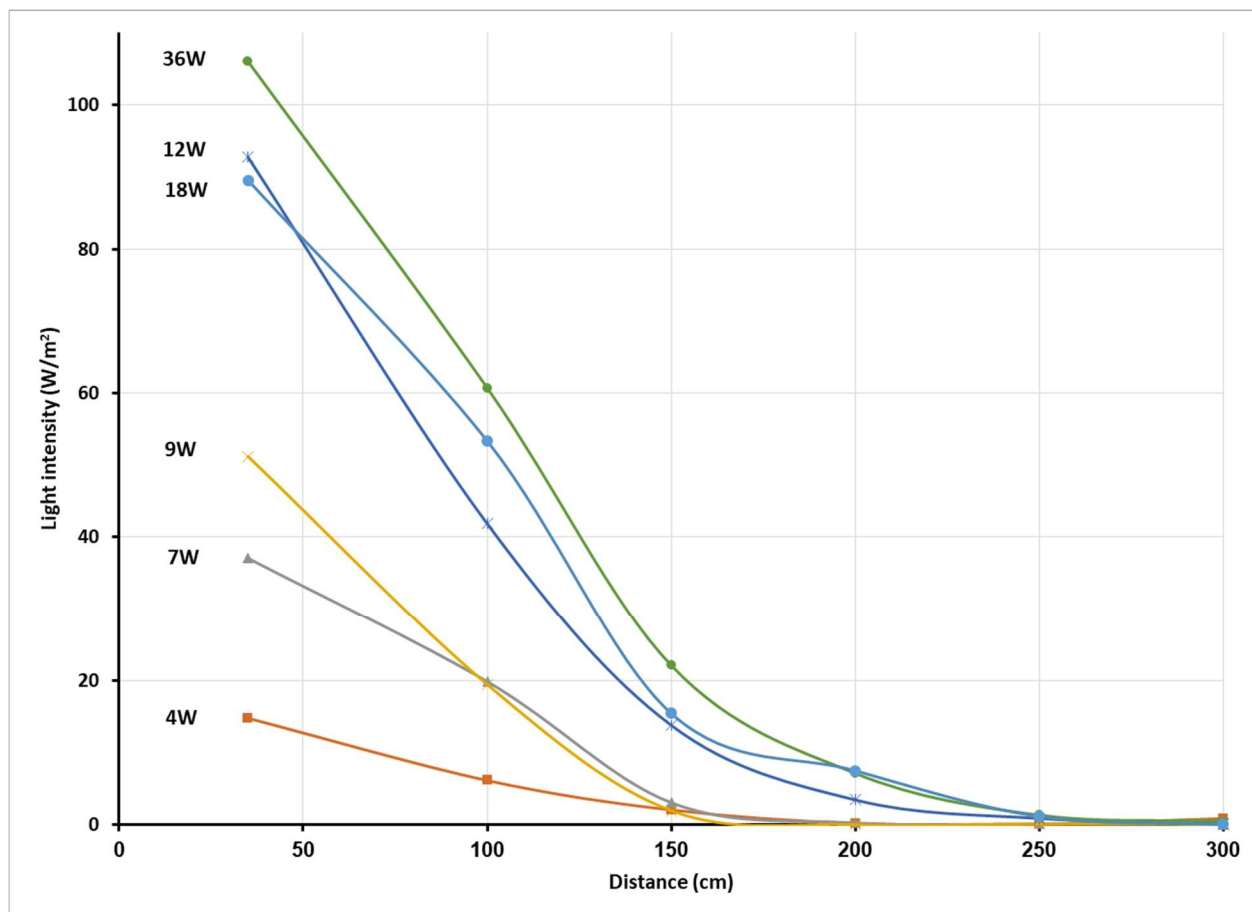

**Figure S2.** The measured light intensity values of LED light sources as a function of the distance
